# Supplementary material
Source: PubMed Central journal article supplement (PMC1838729)
Supplement: pnas_0608566103_3.pdf [file pnas_0608566103_3.pdf]

**Table 3. Representative examples of breakpoint sequences detected in *rrm3 sgs1* and *rrm3 sgs1 mec3* mutants**

| Relevant genotype                 | Breakpoint type                | Representative breakpoint sequence                                                                                                                                                                          |
|-----------------------------------|--------------------------------|-------------------------------------------------------------------------------------------------------------------------------------------------------------------------------------------------------------|
| <i>rrm3 sgs1</i><br>RDKY5577*     | telomere addition              | GGTACTGAACTAGTTGGTATCACTGCTGGTGAAGtgggtgtgggtgtgggtgtgggtgtgg (32539)                                                                                                                                       |
|                                   | translocation (MH)             | V32573 32506<br><u>AGGTACTGAACTAGTTGGTATCACTGCTGGTGAAGCT</u> : GCAAACCCAGAAAATCCGTTCCAAGAGCC<br><u>AGAAAATTGTTATGACTGCCTCTGCTGCCATTAAAACT</u> : CCGCAAATGACTTTGCCATCTGGAATGAT<br>XV964650 964716            |
|                                   | translocation (NH)             | V34294 34228<br><u>GCAACAAGTGATAGAGGGCCATTATGAATAC</u> : GCACCTCTATGTATTTCCGAGATACGATTACTCCA<br><u>CACACATCGCTGCAGTTTCATAATATCTGTCA</u> : CTCACCTGATGCAATAATTAAGTGACGAAATTATAT<br>II259354 259410           |
|                                   | independent mutations          | <i>CAN1</i> wildtype ATAGGTGATGAAGATGAAGGAGAAGTACAGAAC<br>I G D E D E G E V Q N<br>mutant ATAGGTGATGAAGATTAAGGAGAAGTACAGAAC<br>I G D E D *<br><i>URA3</i> deletion                                          |
| <i>rrm3 sgs1 mec3</i><br>RDKY5579 | telomere addition              | GGGCACAAACCCTTGAAAATAGCTTAGCATTTCGcgtgggtgtgggtgtgggtgtgggtgt (34400)                                                                                                                                       |
|                                   | translocation (MH)             | V33208 33142<br><u>GAGCTTAAGCAAAGACATATTGGTATGATTGC</u> : CCTTGGTGGTACTATTGGTACAGGTCTTTTCATTG<br><u>GCCTTGAAGCAAAGACACATTGGTATGATTGC</u> : ACTAGGTGGTACAATCGGTACTGGTCTTTTCGTTG<br>XIV138873 138939          |
|                                   |                                | V34105 34039<br><u>GAAAAAAAAACAAAAAAAAAGAAAATAAATAACG</u> : GCAAACAGCAAAGGCCACAGAACCCTATTTCATGTT<br><u>AAAAAAAAAAAAAAAAAAAAAAAAAACAAAGAGCCA</u> : GCAAACCTGACATTAACATTTGATCAATAAATAAGA<br>XIV779308 779367  |
|                                   | complex inversion <sup>†</sup> | normal chromosome V<br>V34342 34277<br>CCAGTTTCTTTTTTTTTTATCACTTATCAGTCTTATTCGGAGATACAGGCAACAAAGTGATAGAGGG<br>rearranged chromosome V<br>CCAGTTTCTTTTTTTTTTATCACTTGTTCCTGTATCTCCGAATAGGtgtgggtgtgggtgtgtgtg |

---

For translocations, the numbers above and below the sequences are the SGD coordinates for the first and last nucleotide listed; the chromosome number is indicated by a roman numerical. For telomere additions, the number indicates the last recognizable SGD nucleotide coordinate of chromosome V. The underlined nucleotides indicate those present in the translocation chromosome. Nucleotides in bold indicate identities. In the case of the complex inversion, the dotted lines indicate the inverted repeat, the double line indicates those nucleotides lost in the rearranged chromosome and the boxed nucleotides are inverted in the rearranged chromosome. MH, microhomology; NH, nonhomology.

\* The diploid strain RDKY5577 was used to generate *rrm3 sgs1* double mutant spores directly for GCR analysis.

† For a model of the mutational mechanism see Fig. 5.
