# Supplementary material
Source: PubMed Central journal article supplement (PMC1838729)

## normal chromosome V

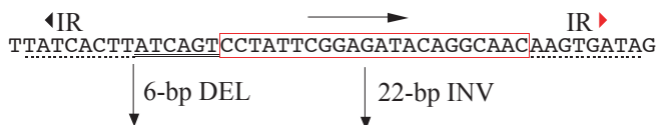

## rearranged chromosome V

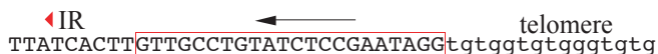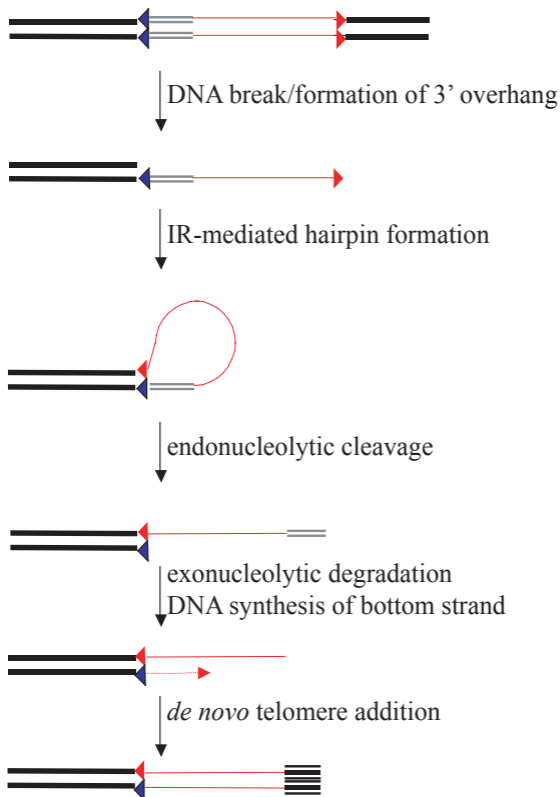

Supplement: pnas_0608566103_1.pdf [file pnas_0608566103_1.pdf]

wildtype

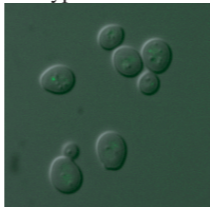

*rrm3*

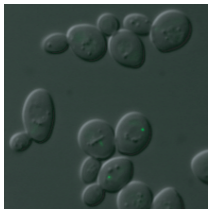

*srs2*

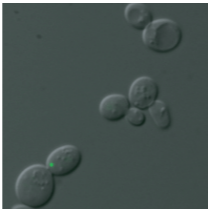

*sgs1*

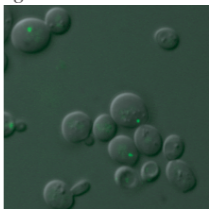

*rrm3 srs2*

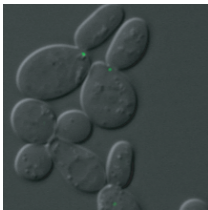

*rrm3 sgs1*

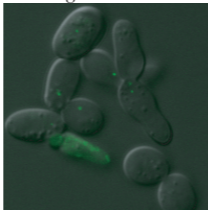

*srs2 sgs1*

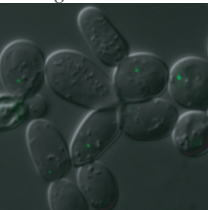

Supplement: pnas_0608566103_2.pdf [file pnas_0608566103_2.pdf]
